# Supplementary material for: A novel environment-tolerant hydrogel via a combination effect of a polyurethane coating and hygroscopic salt for underwater monitoring
Source: Royal Society of Chemistry journal article supplement (doi:10.1039/d3tc00444a), 2023-01-01
Supplement: d3tc00444a3.pdf [file d3tc00444a3.pdf]

## Supporting Information

### **A novel environment-tolerant hydrogel via combination effect of polyurethane coating and hygroscopic salt for underwater monitoring**

Xiaobin Li<sup>a, b</sup>, Fuping Bian<sup>a, b</sup>, Jun Shi<sup>a, b, f, \*</sup>, Ending Zhang<sup>a, b, d</sup>, Chenguang Kong<sup>a, b</sup>,  
Jianrong Ren<sup>a, b, c</sup>, Kun Wu<sup>a, b, e</sup>

<sup>a</sup> *Guangzhou Institute of Chemistry, Chinese Academy of Sciences, Guangzhou 510650, People's Republic of China.*

<sup>b</sup> *University of Chinese Academy of Sciences, Beijing 10049, People's Republic of China.*

<sup>c</sup> *CAS Engineering Laboratory for Special Fine Chemicals, Guangzhou 510650, People's Republic of China.*

<sup>d</sup> *Guangdong Provincial Key Laboratory of Organic Polymer Materials for Electronics, Guangzhou 510650, People's Republic of China.*

<sup>e</sup> *CASH GCC Shaoguan Research Institute of Advanced Materials. Shaoguan 512440, People's Republic of China*

<sup>f</sup> *New Materials Research Institute of CASCHEM (Chongqing) Co., Ltd, Chongqing, 400714, People's Republic of China.*

\*Corresponding author, E-mail address: junshi@gic.ac.cn (Jun Shi).

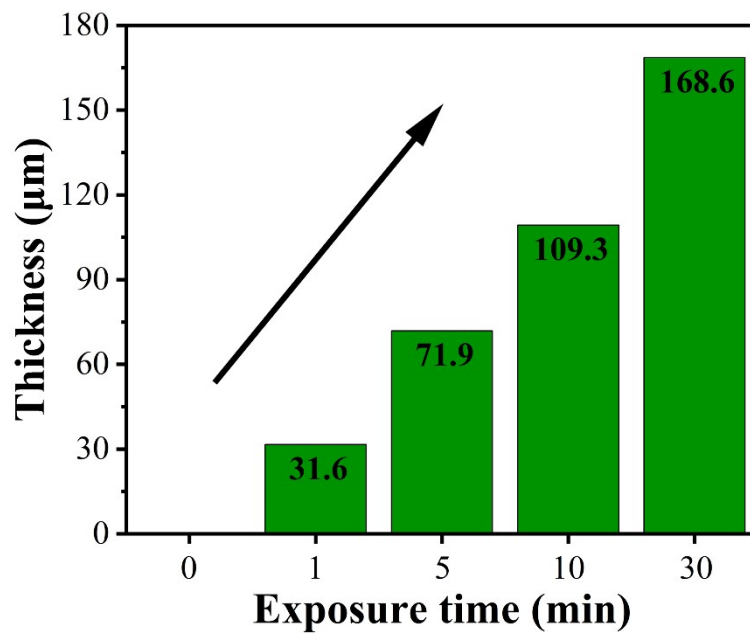

Figure S1. The thickness of the polyurethane coating with different UV exposure times.

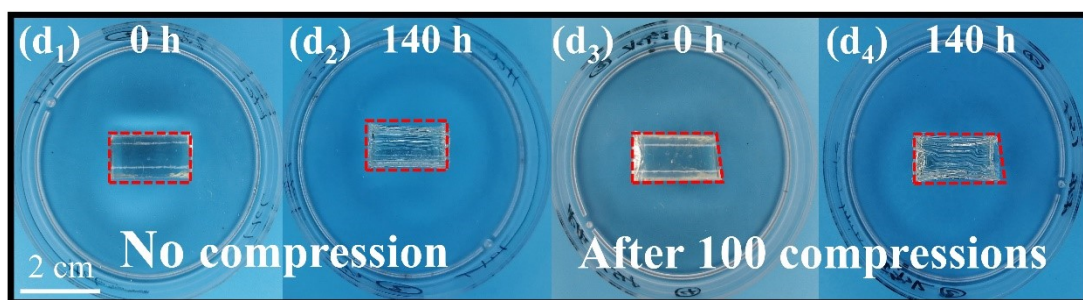

Figure S2. Photographs of the 8M PAAm with coating-UV-30 before and after 100 consecutive compressions during the drying experiments with 30 RH% at 25 °C for 140 h.

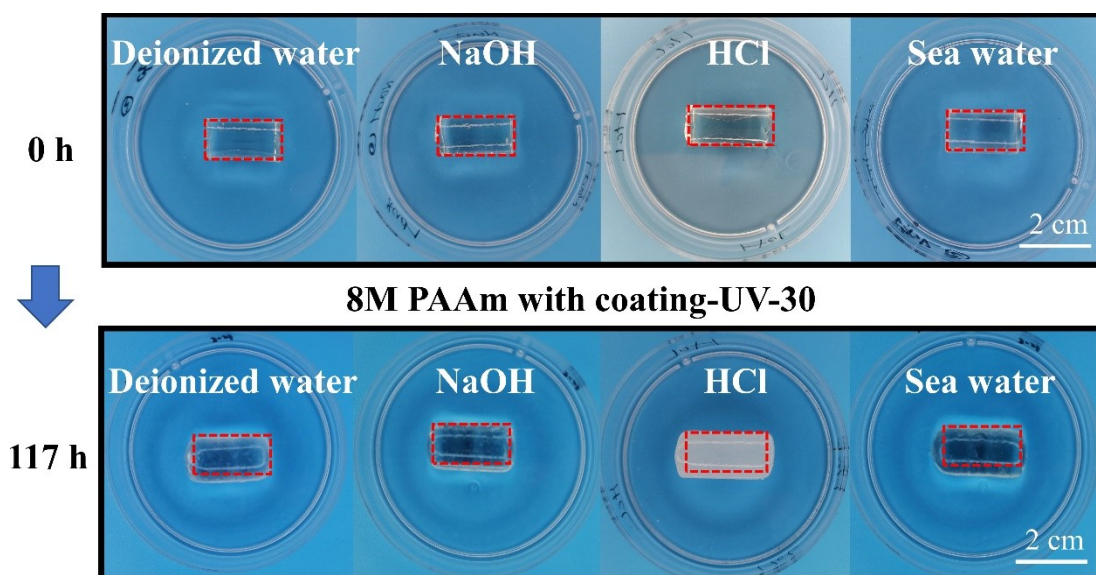

Figure S3. Snapshots of 8M PAAm with coating-UV-30 hydrogels being soaked for 117 h in different conditions.

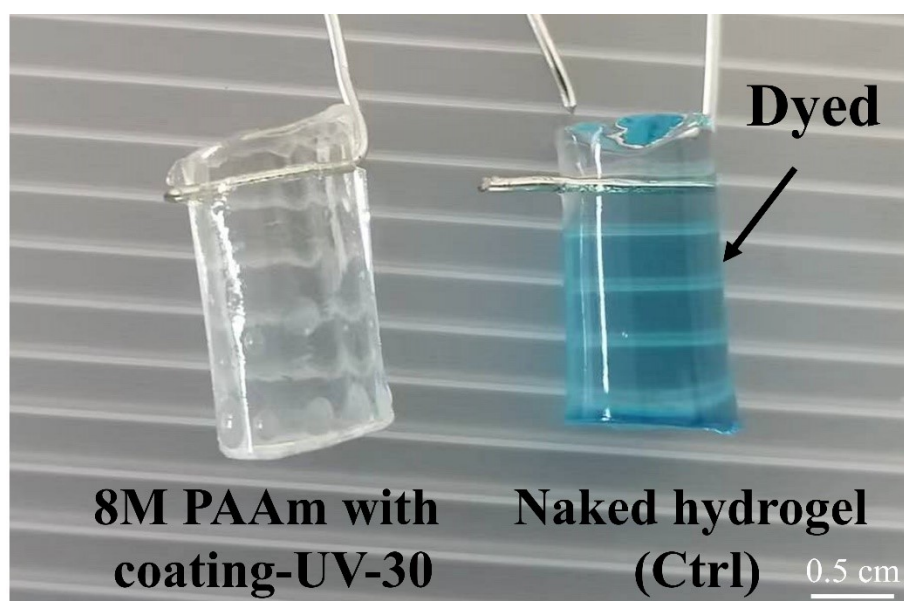

Figure S4. A comparison photo of 8M PAAm with coating-UV-30 and 8M PAAm without coating hydrogels immersed in colored water for 3 min, then taken out and washed with deionized water. The color of 8M PAAm with coating-UV-30 was readily washed away in clean water while the naked hydrogel cannot be washed away. The dye was methylene blue.

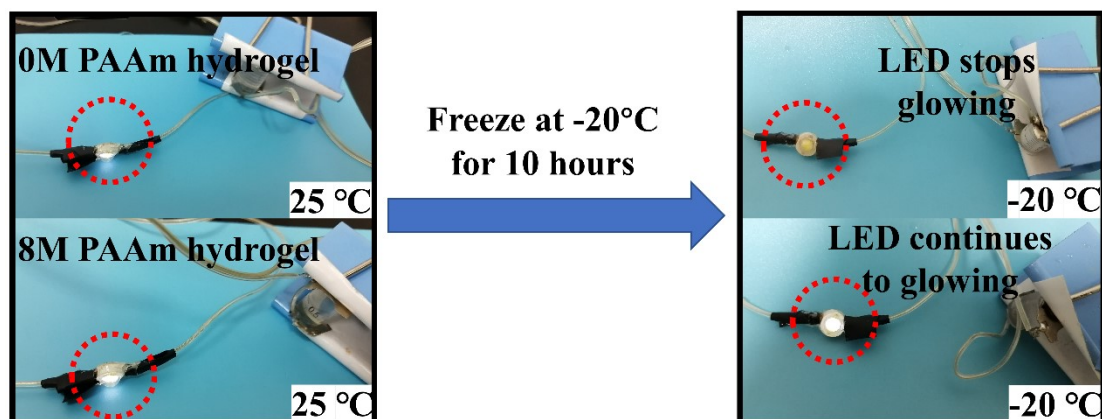

Figure S5. Anti-freezing measurements of LiCl-free and LiCl-based PAAm hydrogel (8M) as a wire in an electric circuit. The LiCl-based hydrogel was still conductive after freezing at  $-20\text{ }^{\circ}\text{C}$  for 10 h, the LED continued to glow, whereas the LED went out in the circuit where the LiCl-free hydrogel was.

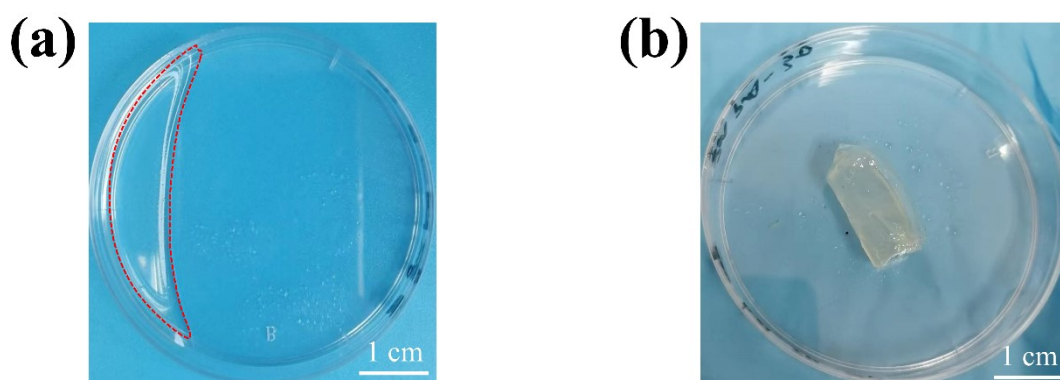

Figure S6. (a) The 8M PVA without coating hydrogel undergoing gelation from a gel state into a viscous state. (b) The photograph of 8M PVA with coating-UV-30 hydrogel placed in an environment with a designed RH program after 120 h.



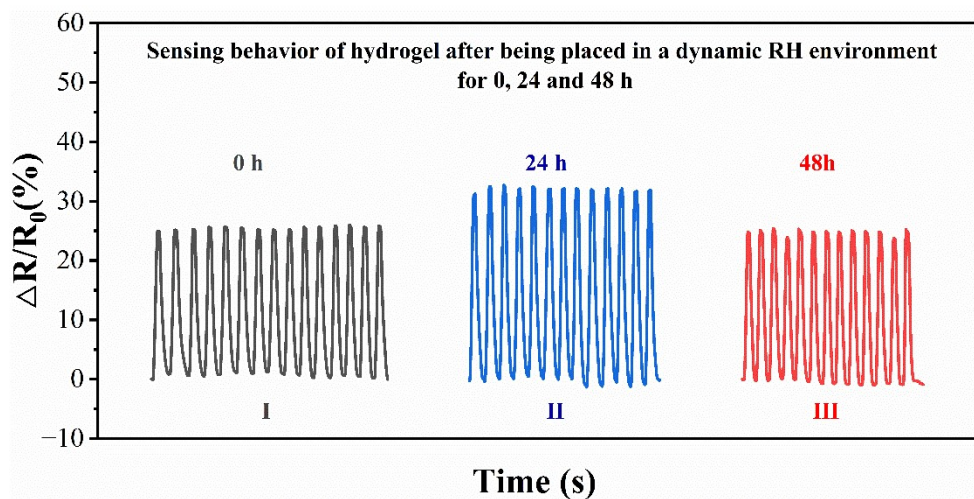

Figure S7. The sensing behavior of 8M PAAm with coating-UV-30 hydrogel at 15% strain in air. The sensing signals I, II, and III were obtained after the hydrogel was placed in a dynamic RH environment as same as Figure 3c for 0, 24 and 48 h, respectively.
